# Supplementary material
Source: Springer Nature journal article supplement (https://www.springermedizin.de/resource/supplementary/12891_2005_212_MOESM2_ESM.pdf/9510752)

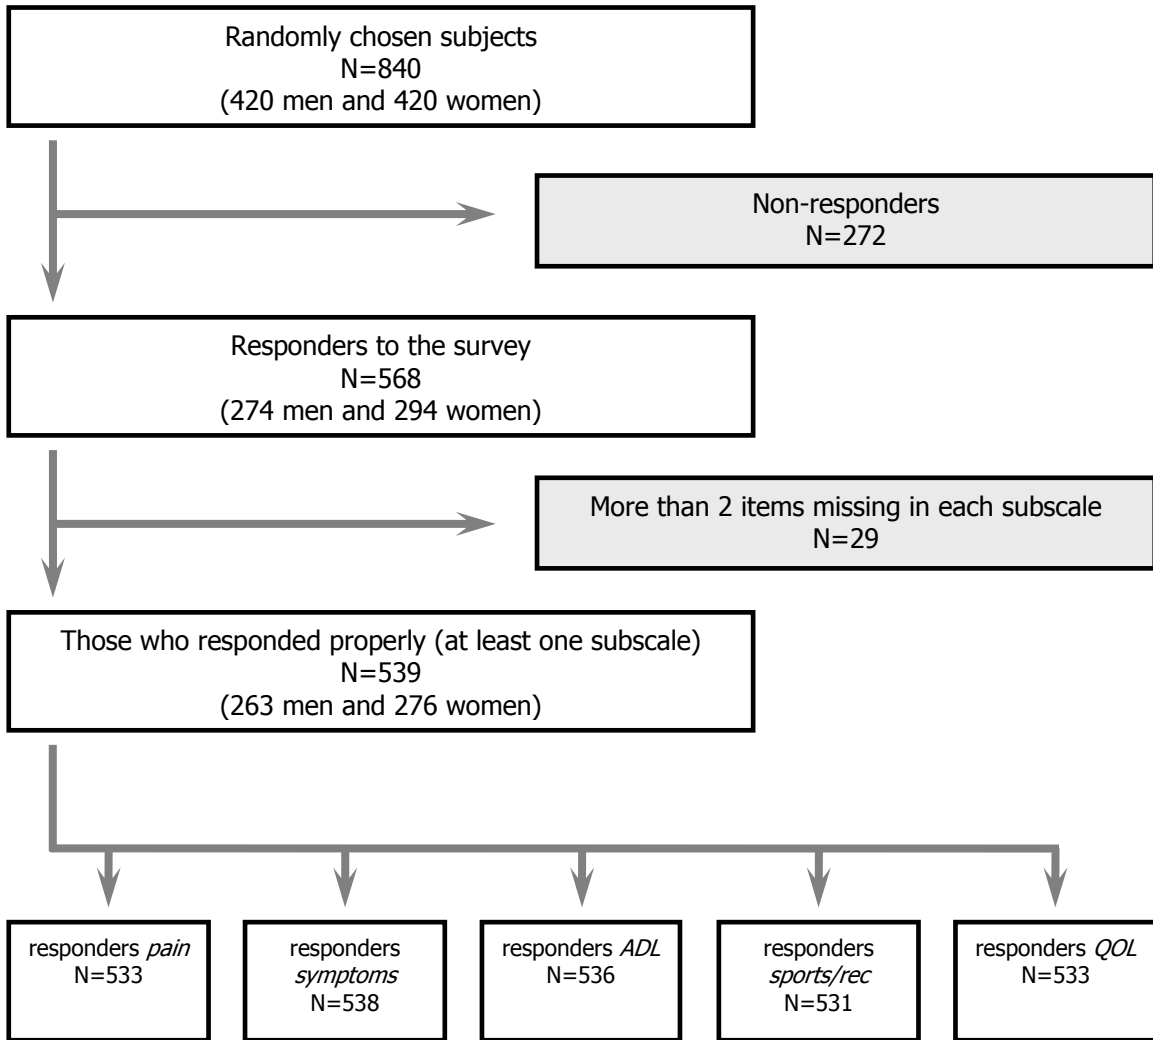

Supplement: MOESM2 [file 9510752]
